# Supplementary material for: Fluorescence detection of malachite green and cations (Cr3+, Fe3+ and Cu2+) by a europium-based coordination polymer
Source: Royal Society of Chemistry journal article supplement (doi:10.1039/d2ra00077f), 2022-01-01
Supplement: d2ra00077f1.pdf [file d2ra00077f1.pdf]

Electronic Supplementary Material (ESI) for RSC Advances.  
This journal is © The Royal Society of Chemistry 2022

## Supporting Information

### Fluorescence Detection of Malachite Green and Cations ( $\text{Cr}^{3+}$ , $\text{Fe}^{3+}$ and $\text{Cu}^{2+}$ ) by A Europium-Based Coordination Polymer

Ya-Jie Kong,<sup>a</sup> Guo-Zheng Hou,<sup>a</sup> Zhao-Ning Gong,<sup>a</sup> Feng-Tan Zhao,<sup>a</sup> and Li-Juan Han<sup>\*a, b</sup>

<sup>a</sup> School of Chemistry, Chemical Engineering and Materials, Jining University, Qufu, 273155, P. R. China

<sup>b</sup> State Key Laboratory of Coordination Chemistry, School of Chemistry and Chemical Engineering, Nanjing University, Nanjing 210023, P. R. China

\* Corresponding authors: [hanlij78@163.com](mailto:hanlij78@163.com)

## Materials and instrumentation

All reagents and solvents were commercially available and used as received without further purification. The IR absorption spectra of these complexes were recorded in the range of 400-4000  $\text{cm}^{-1}$  by means of a Nicolet (Impact 410) spectrometer with KBr pellets. PXRD measurements were performed on a Bruker D8 Advance X-ray diffractometer using  $\text{Cu-K}\alpha$  radiation (0.15418 nm), in which the X-ray tube was operated at 40 kV and 30 mA. TG analysis was performed on a Perkin Elmer thermogravimetric analyzer from room temperature to 1000  $^{\circ}\text{C}$  with a heating rate of 10  $\text{K}\cdot\text{min}^{-1}$  under  $\text{N}_2$  atmosphere. Photoluminescence spectra were recorded on the Hitachi 850 fluorescence spectrophotometer at ambient temperature.

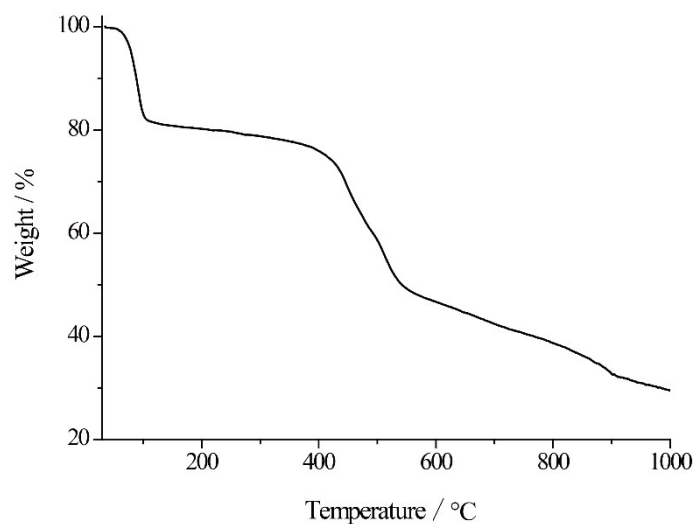

**Fig. S1** TGA plot Eu-PDCA.

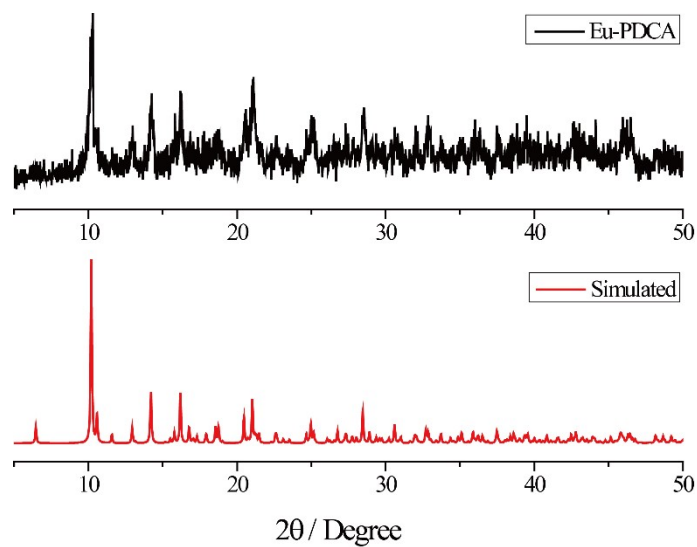

**Fig. S2** PXRD of Eu-PDCA.

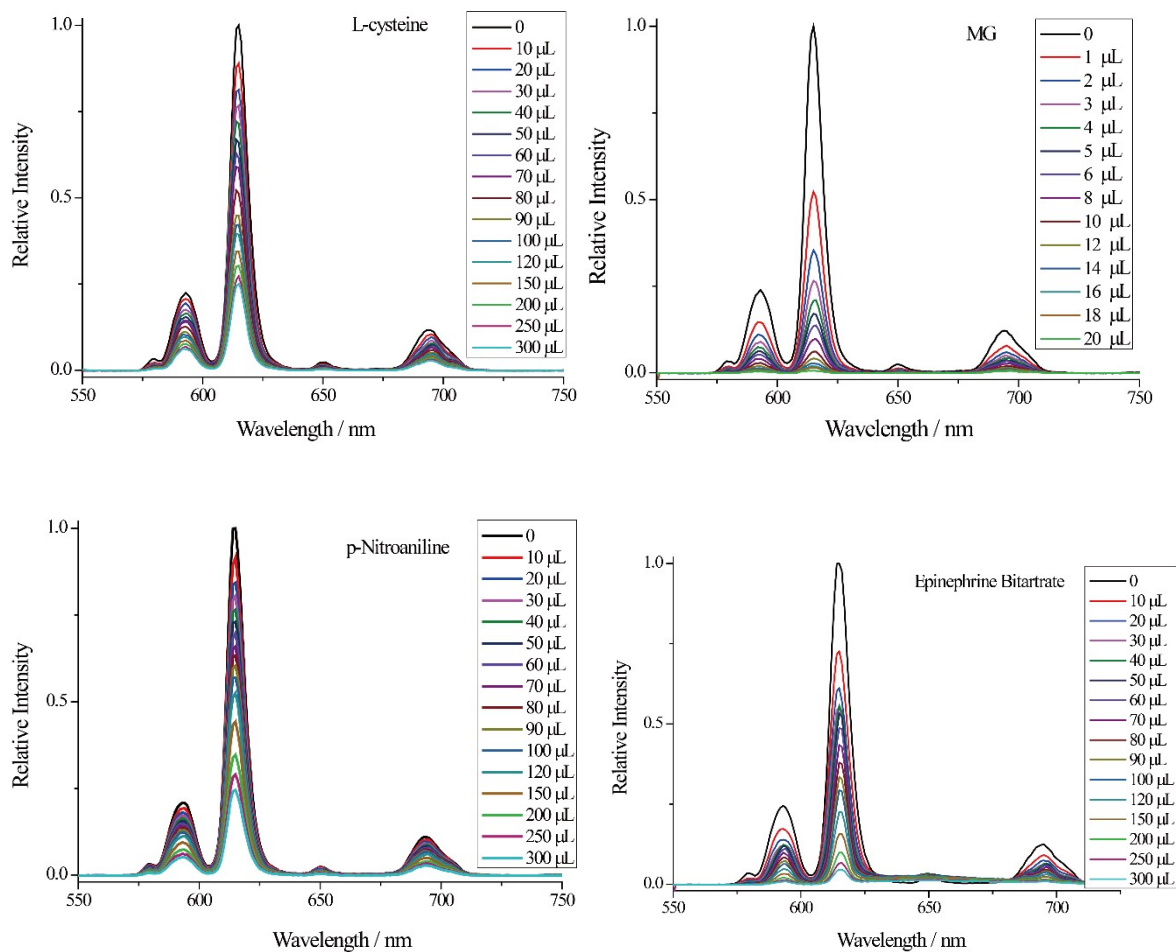

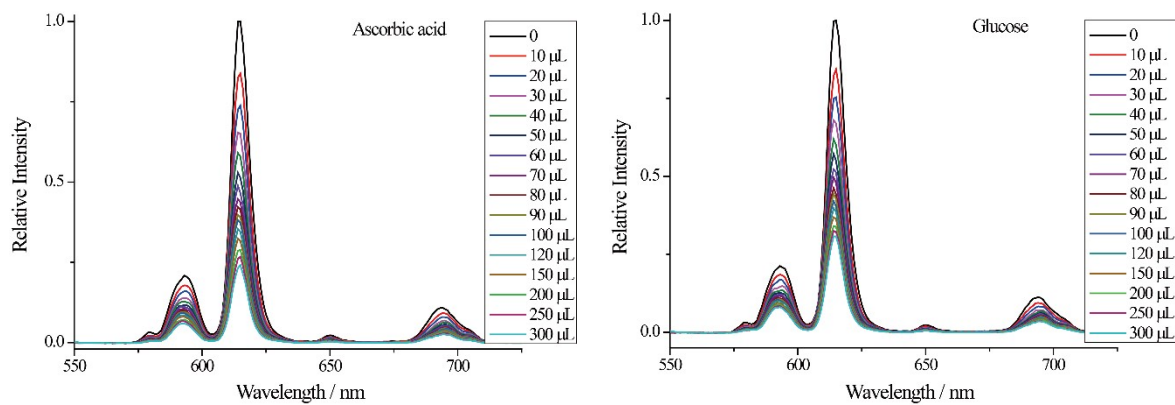

**Fig. S3** Fluorescence spectra of Eu-PDCA (ethanol suspension, 1.0 mL) before and after added various analytes (excited at 265 nm).

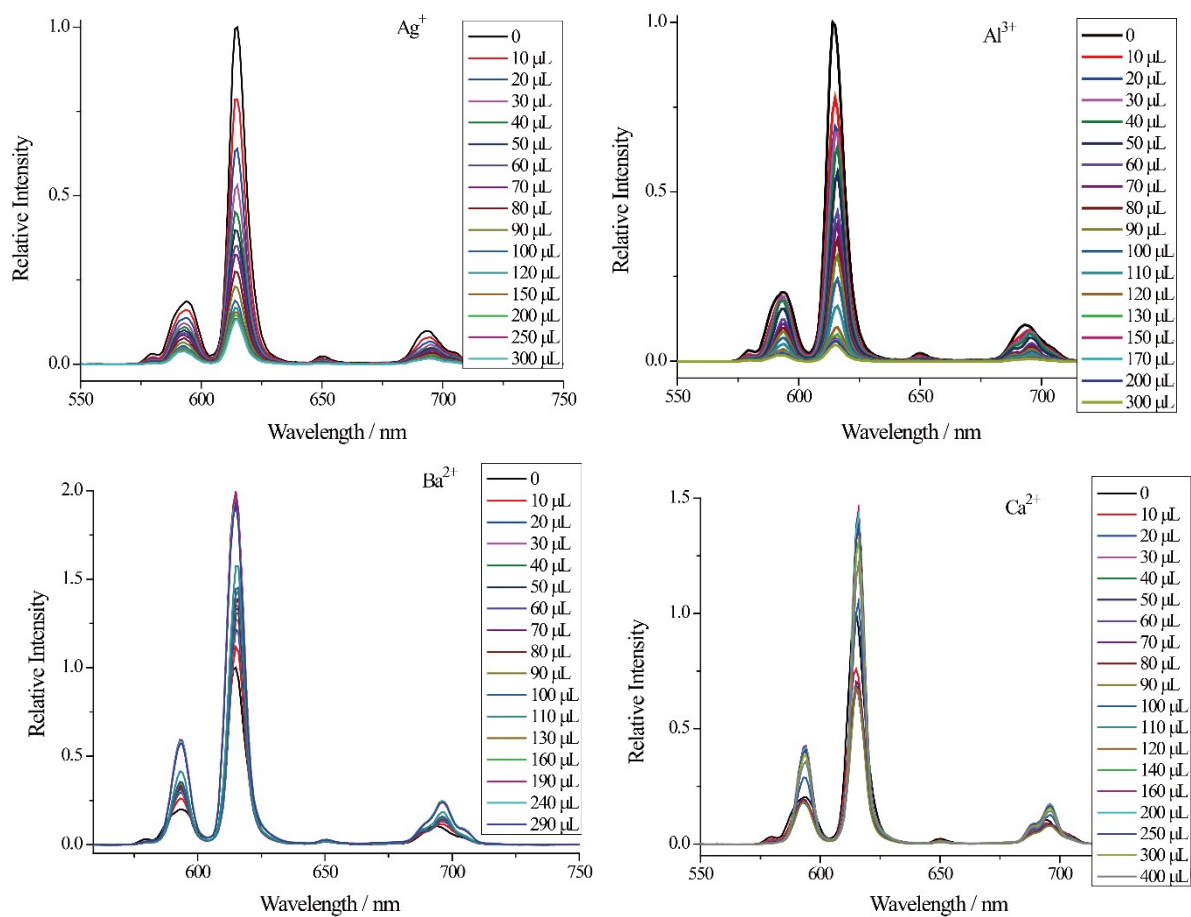

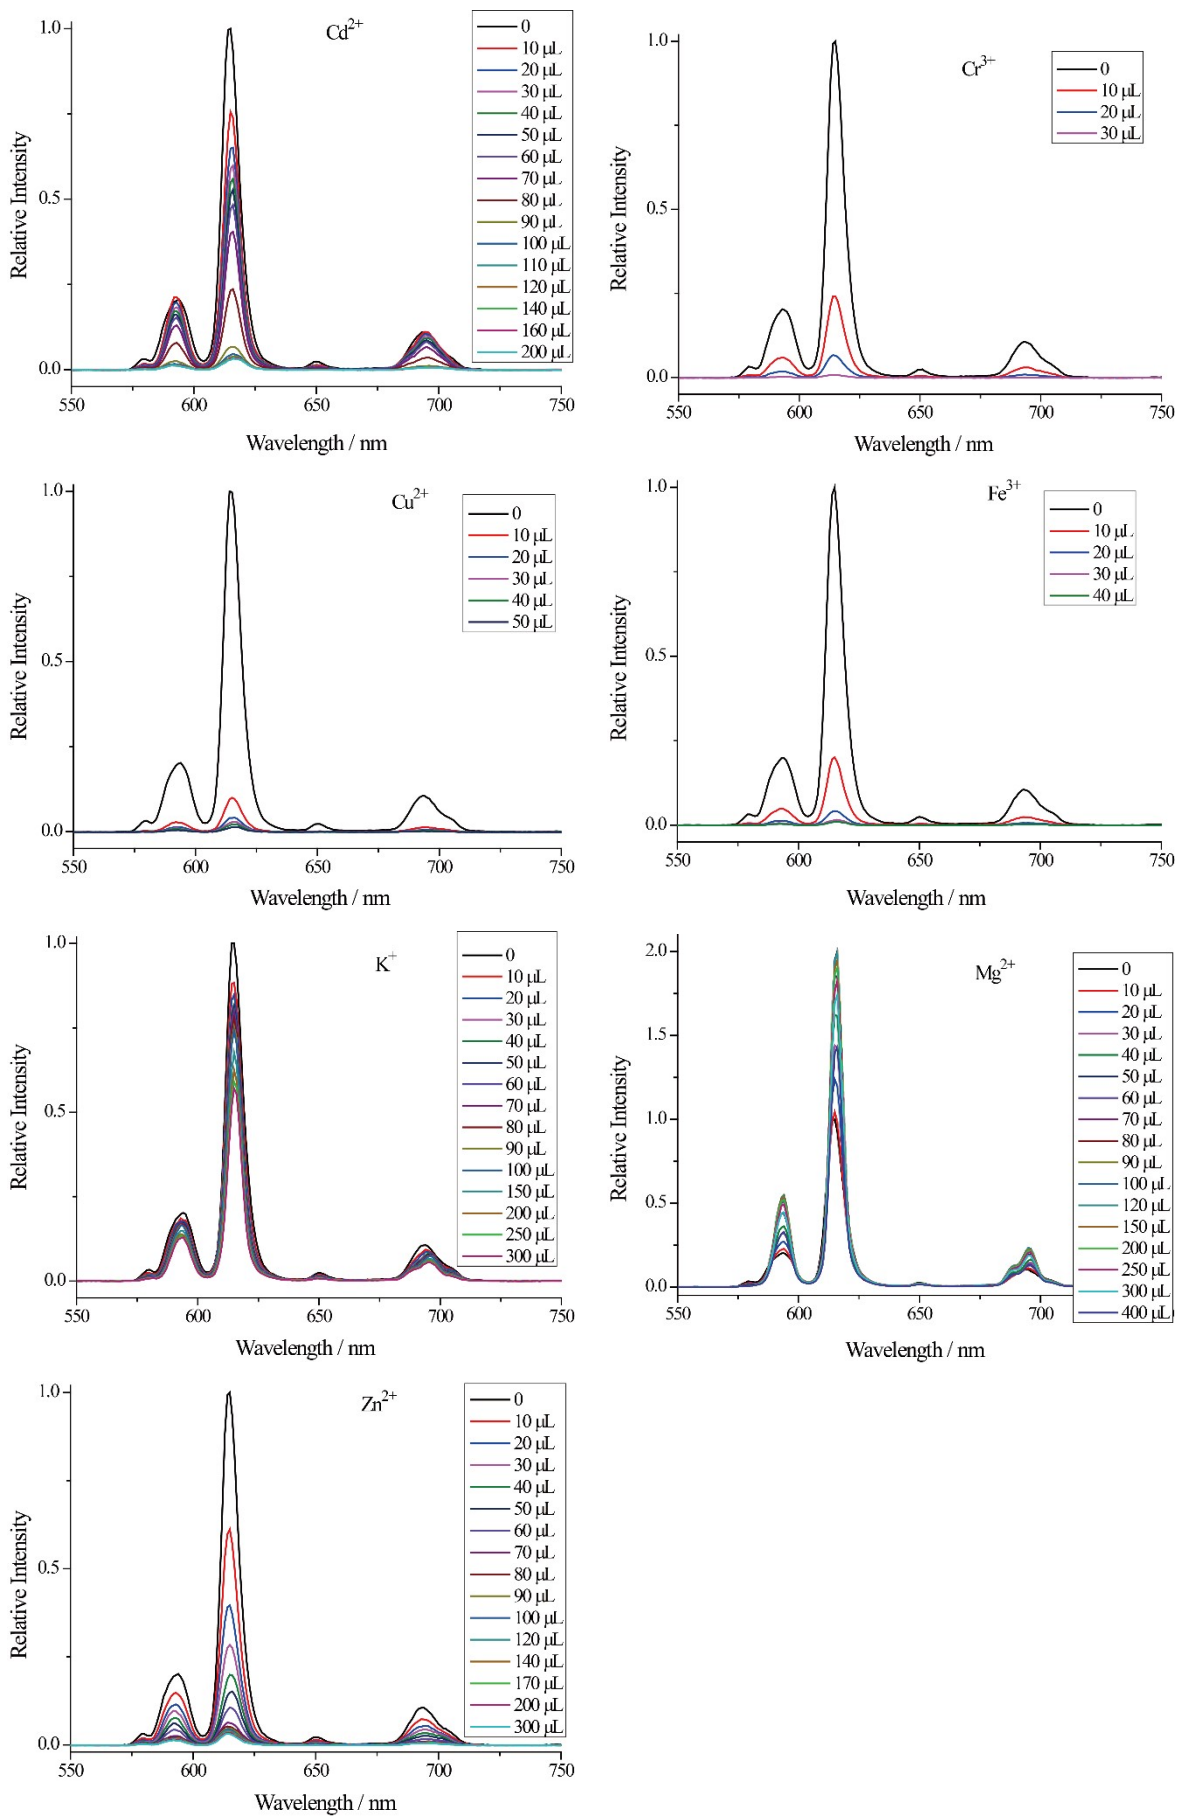

**Fig. S4** Fluorescence spectra of Eu-PDCA (ethanol suspension, 1.0 mL) before and after

added different metal ions (excited at 265 nm).

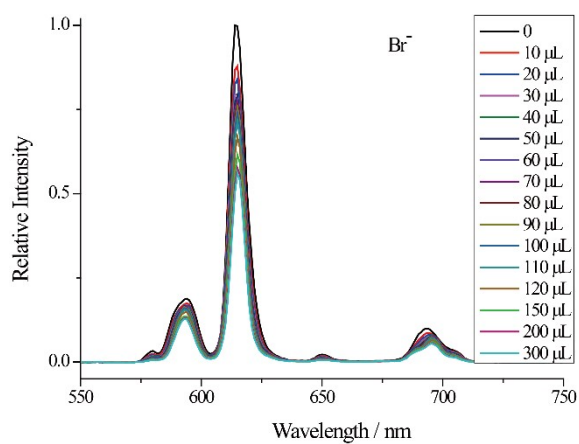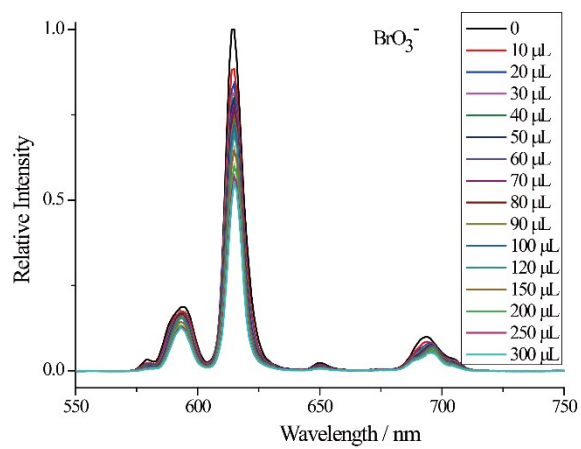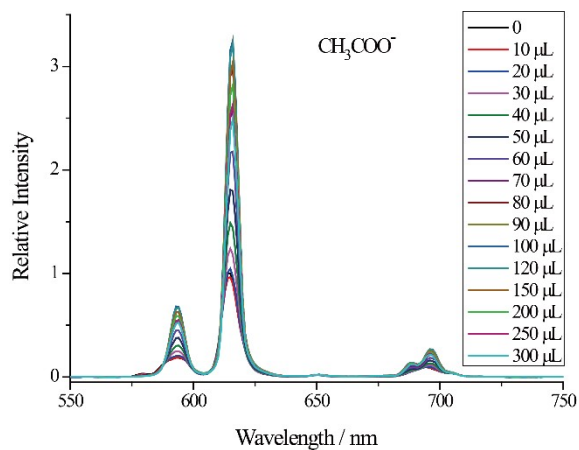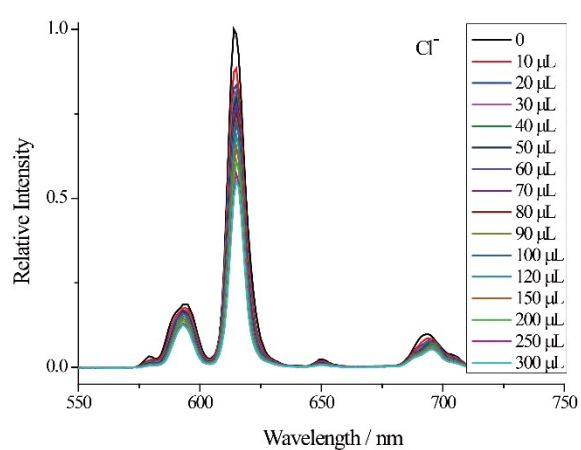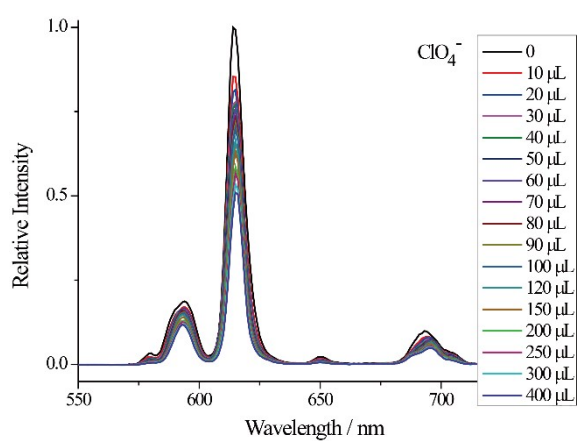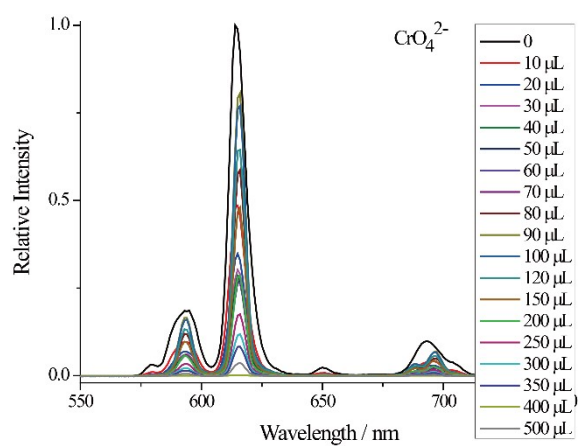

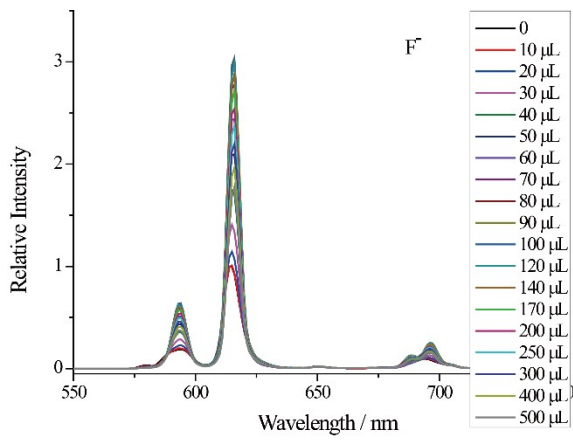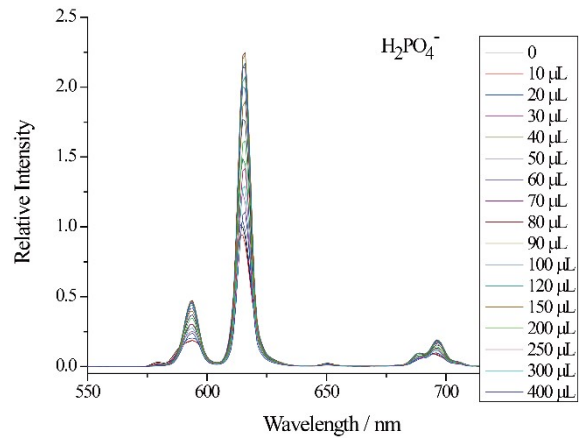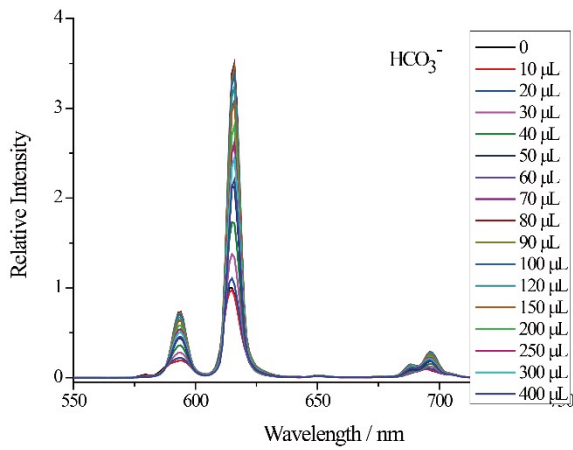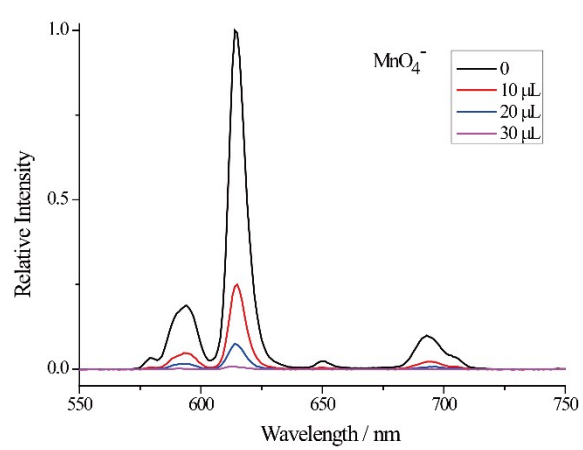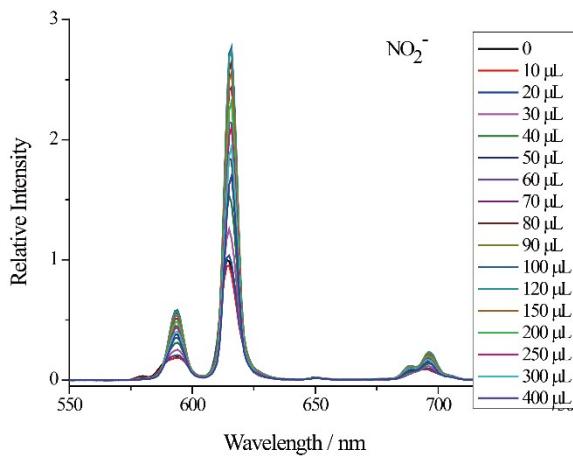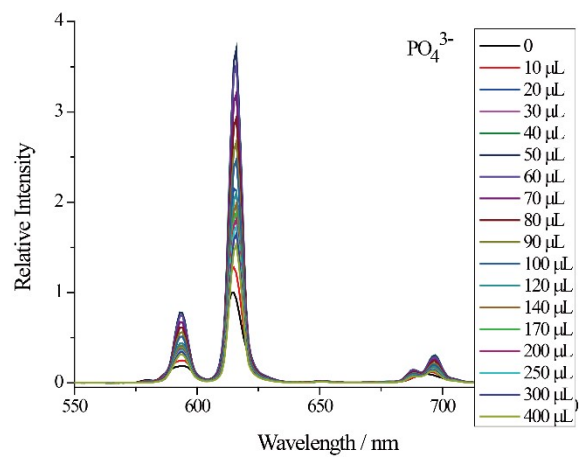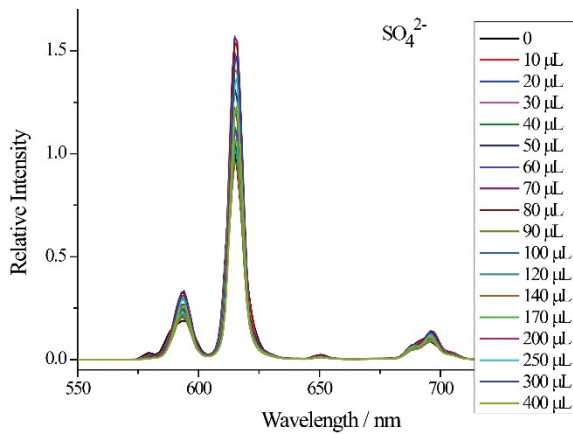

**Fig. S5** Fluorescence spectra of Eu-PDCA (ethanol suspension, 1.0 mL) before and after added different anions (excited at 265 nm).

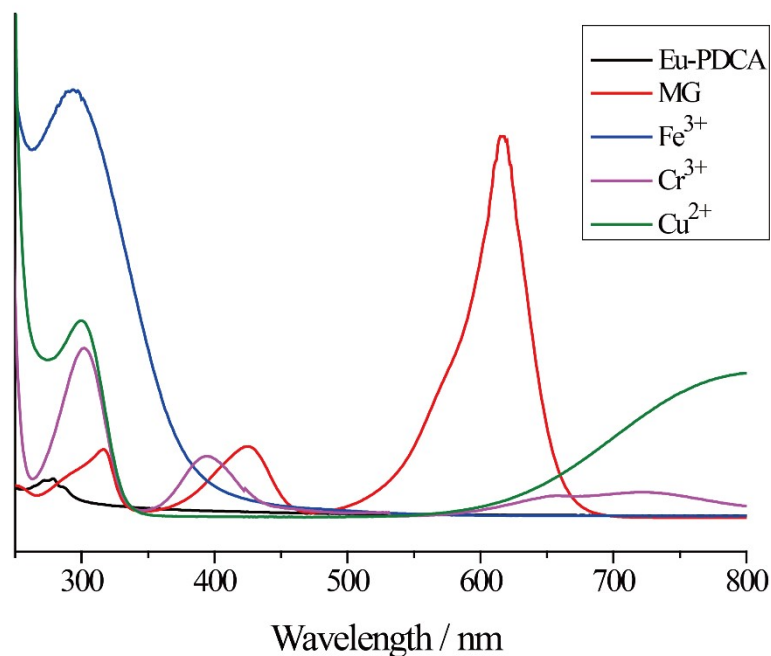

**Fig. S6** Liquid UV-vis spectra of Eu-PDCA, MG, Cr<sup>3+</sup>, Fe<sup>3+</sup> and Cu<sup>2+</sup>.

**Table S1** Selected bond lengths (Å) and angles (°) for Eu-PDCA.

|            |            |                 |          |
|------------|------------|-----------------|----------|
| Eu(1)-O(5) | 2.3881(16) | O(5)-Eu(1)-O(7) | 80.15(6) |
| Eu(1)-O(8) | 2.4291(17) | O(8)-Eu(1)-O(7) | 97.17(7) |
| Eu(1)-O(7) | 2.4369(16) | O(5)-Eu(1)-O(4) | 71.82(6) |
| Eu(1)-O(4) | 2.4387(15) | O(8)-Eu(1)-O(4) | 70.41(6) |
| Eu(1)-O(2) | 2.4632(16) | O(7)-Eu(1)-O(4) | 74.38(6) |
| Eu(1)-O(9) | 2.5109(16) | O(5)-Eu(1)-O(2) | 85.75(6) |
| Eu(1)-N(4) | 2.5613(18) | O(8)-Eu(1)-O(2) | 78.34(7) |
| Eu(1)-N(3) | 2.563(2)   | O(2)-Eu(1)-N(4) | 62.92(6) |
|            |            | O(9)-Eu(1)-N(4) | 65.28(6) |
|            |            | O(8)-Eu(1)-N(3) | 73.38(6) |
|            |            | O(7)-Eu(1)-N(3) | 63.00(6) |



**Table S2** Crystal data and structure refinement for Eu-PDCA.

| Eu-PDCA                                            |                                                                  |
|----------------------------------------------------|------------------------------------------------------------------|
| Empirical formula                                  | C <sub>14</sub> H <sub>18</sub> EuN <sub>2</sub> O <sub>14</sub> |
| Formula weight                                     | 590.27                                                           |
| Crystal color                                      | Yellow                                                           |
| Crystal size (mm)                                  | 0.16 x 0.15 x 0.12                                               |
| Crystal system                                     | Monoclinic                                                       |
| space group                                        | <i>P2<sub>1</sub>/c</i>                                          |
| a (Å)                                              | 14.0026(6)                                                       |
| b (Å)                                              | 11.2217(5)                                                       |
| c (Å)                                              | 12.8398(5)                                                       |
| α (deg)                                            | 90.00                                                            |
| β (deg)                                            | 102.4680(10)                                                     |
| γ (deg)                                            | 90.00                                                            |
| Volume (Å <sup>3</sup> )                           | 1969.98(14)                                                      |
| Z                                                  | 2                                                                |
| d <sub>calcd</sub> (g/cm <sup>3</sup> )            | 1.990                                                            |
| μ (mm <sup>-1</sup> )                              | 3.262                                                            |
| F (000)                                            | 1164.0                                                           |
| λ (Å)                                              | 0.71073                                                          |
| Temperature                                        | 293(2) K                                                         |
| θ range (deg)                                      | 1.49 to 27.21                                                    |
| h ,k, l range                                      | -16<=h<=12<br>-12<=h<=14<br>-17<=h<=17                           |
| Reflections collected / unique                     | 11853 / 8500<br>[R(int) = 0.0120]                                |
| Completeness to θ                                  | 97.0 % (θ = 27.21)                                               |
| Data / restraints / parameters                     | 8500 / 2 / 595                                                   |
| Goodness-of-fit on F <sup>2</sup>                  | 1.049                                                            |
| Final R indices [I>2σ(I)] <sup>a</sup>             | R1 = 0.0171<br>wR2 = 0.0413                                      |
| R indices (all data)                               | R1 = 0.0203<br>wR2 = 0.0423                                      |
| Largest diff. Peak<br>and hole(e·Å <sup>-3</sup> ) | 0.619<br>and -0.470                                              |
